# Supplementary material for: First typology of cacao (Theobroma cacao L.) systems in Colombian Amazonia, based on tree species richness, canopy structure and light availability
Source: PLoS One. 2018 Feb 5;13(2):e0191003. doi: 10.1371/journal.pone.0191003 (PMC5798779; doi:10.1371/journal.pone.0191003)
Supplement: S1 File — Raw data of tree species abundance, frequency, dominance and basal area in the study plots, used to compute the Importance Value Index (IVI) and the Physiognomic Predominance Index PPI. (XLSX) [file pone.0191003.s001.xlsx]

## Sheet: Hoja1
	Abundance absolute				Abundance relative				Dominance Absolute				Dominace relative				Frecuency absolute				Frecuency Relative				Index Value Importance				Canopy Area absolute				Canopy Area relative				Physiognomic Predominance Index
Species	CDM	LDR	LDC	HDM	CDM	LDR	LDC	HDM	CDM	LDR	LDC	HDM	CDM	LDR	LDC	HDM	CDM	LDR	LDC	HDM	CDM	LDR	LDC	HDM	CDM	LDR	LDC	HDM	CDM	LDR	LDC	HDM	CDM	LDR	LDC	HDM	CDM	LDR	LDC	HDM
Acalypha diversifolia Jacq.	3	1	3	0	1.0101	0.740741	6.12245	0	0.02108	0.00497357	0.008467	0	0.330152	0.102319	0.340403	0	2	1	1		1.31579	1.17647	2.85714	0	2.65604	2.01953	9.31999	0	9.53386	3.40885	9.34297	0	0.749692	0.442906	2.14747	0	1.78087	1.18862	8.27838	0
Acalypha cf. stachyura Pax	5	2	1	1	1.6835	1.48148	2.04082	14.2857	0.0698686	0.162504	0.0980469	0.130379	1.09427	3.34313	3.94183	13.6412	1	1	1	1	0.657895	1.17647	2.85714	6.66667	3.43567	6.00108	8.83979	34.5936	13.33	8.22486	10.5592	7.46674	1.0482	1.06864	2.42703	2.21172	2.80157	2.71263	4.56589	16.6278
Albizia sp. 1	1	0	1	0	0.3367	0	2.04082	0	0.0223532	0	0.0258546	0	0.350093	0	1.03945	0	1	0	1		0.657895	0	2.85714	0	1.34469	0	5.9374	0	1.22718	0	5.93957	0	0.0964993	0	1.3652	0	0.455553	0	3.43187	0
Alchornea glandulosa Poepp.	0	1	0	0	0	0.740741	0	0	0	0.0240721	0	0	0	0.495224	0	0	0	1	0		0	1.17647	0	0	0	2.41243	0	0	0	8.29577	0	0	0	1.07786	0	0	0	1.84267	0	0
Alchornea latifolia Sw.	0	1	0	0	0	0.740741	0	0	0	0.00318308	0	0	0	0.0654841	0	0	0	1	0		0	1.17647	0	0	0	1.9827	0	0	0	0.921752	0	0	0	0.119762	0	0	0	0.863686	0	0
Alibertia sp. 1	0	1	0	0	0	0.740741	0	0	0	0.0114909	0	0	0	0.236398	0	0	0	1	0		0	1.17647	0	0	0	2.15361	0	0	0	1.76715	0	0	0	0.229603	0	0	0	0.981834	0	0
Allophylus sp. 1	0	0	1	0	0	0	2.04082	0	0	0	0.000644575	0	0	0	0.0259141	0	0	0	1		0	0	2.85714	0	0	0	4.92387	0	0	0	1.22718	0	0	0	0.282067	0	0	0	2.32353	0
Allophylus floribundus (poepp) Randlk	0	1	0	0	0	0.740741	0	0	0	0.00866595	0	0	0	0.178281	0	0	0	1	0		0	1.17647	0	0	0	2.09549	0	0	0	3.40885	0	0	0	0.442906	0	0	0	1.19231	0	0
Anacardium cf. Parvifolium	1	0	0	0	0.3367	0	0	0	0.0127323	0	0	0	0.199412	0	0	0	1	0	0		0.657895	0	0	0	1.19401	0	0	0	3.97608	0	0	0	0.312658	0	0	0	0.66209	0	0	0
Andira vermifuga Mart. ex Benth.	1	0	0	0	0.3367	0	0	0	0.00155971	0	0	0	0.024428	0	0	0	1	0	0		0.657895	0	0	0	1.01902	0	0	0	0.921752	0	0	0	0.0724817	0	0	0	0.410742	0	0	0
Andira cf. multistipula Ducke	0	1	0	0	0	0.740741	0	0	0	0.00203717	0	0	0	0.0419098	0	0	0	1	0		0	1.17647	0	0	0	1.95912	0	0	0	1.06901	0	0	0	0.138895	0	0	0	0.881673	0	0
Annona sp. 1	1	0	0	0	0.3367	0	0	0	0.0106017	0	0	0	0.166042	0	0	0	1	0	0		0.657895	0	0	0	1.16064	0	0	0	2.40528	0	0	0	0.189139	0	0	0	0.536441	0	0	0
Apeiba aspera Aubl.	1	0	0	0	0.3367	0	0	0	0.00229978	0	0	0	0.0360188	0	0	0	1	0	0		0.657895	0	0	0	1.03061	0	0	0	1.57625	0	0	0	0.123948	0	0	0	0.462948	0	0	0
Apuleia cf. leiocarpa (Vogel) J.F. Macbr	1	0	0	0	0.3367	0	0	0	0.0401148	0	0	0	0.628273	0	0	0	1	0	0		0.657895	0	0	0	1.62287	0	0	0	6.68134	0	0	0	0.525385	0	0	0	0.9022	0	0	0
Asteraceae sp.1	0	2	0	1	0	1.48148	0	14.2857	0	0.00235548	0	0.00235548	0	0.0484582	0	0.246448	0	1	0	1	0	1.17647	0	6.66667	0	2.70641	0	21.1988	0	1.70715	0	4.91419	0	0.221807	0	1.45563	0	1.70564	0	15.7437
Astronium graveolens Jacq.	0	2	0	0	0	1.48148	0	0	0	0.0563565	0	0	0	1.1594	0	0	0	2	0		0	2.35294	0	0	0	4.99382	0	0	0	4.91419	0	0	0	0.638494	0	0	0	2.17633	0	0
Bauhinia tarapotensis Benth.	0	0	1	0	0	0	2.04082	0	0	0	0.00814869	0	0	0	0.327606	0	0	0	1		0	0	2.85714	0	0	0	5.22557	0	0	0	5.24144	0	0	0	1.20474	0	0	0	3.2537	0
Beilschmiedia sp.1	3	3	0	0	1.0101	2.22222	0	0	0.0693355	0.135861	0	0	1.08592	2.795	0	0	1	1	0		0.657895	1.17647	0	0	2.75392	6.19369	0	0	8.66665	23.5947	0	0	0.681499	3.06562	0	0	1.76094	5.4237	0	0
Bellucia pentamera Naudin	1	0	0	0	0.3367	0	0	0	0.00420963	0	0	0	0.0659306	0	0	0	1	0	0		0.657895	0	0	0	1.06053	0	0	0	1.06901	0	0	0	0.0840616	0	0	0	0.424972	0	0	0
Billia rosea (Planch. & Linden) C. Ulloa & P. Jørg.	0	1	0	0	0	0.740741	0	0	0	0.0484147	0	0	0	0.996013	0	0	0	1	0		0	1.17647	0	0	0	2.91322	0	0	0	5.10705	0	0	0	0.663552	0	0	0	1.45271	0	0
Brosimum cf. lactescens (S. Moore) C.C. Berg	1	0	0	0	0.3367	0	0	0	0.208842	0	0	0	3.27086	0	0	0	1	0	0		0.657895	0	0	0	4.26545	0	0	0	3.40885	0	0	0	0.268054	0	0	0	0.813596	0	0	0
Brownea macrophylla horn. ex Mast.	1	0	0	0	0.3367	0	0	0	0.0325948	0	0	0	0.510495	0	0	0	1	0	0		0.657895	0	0	0	1.50509	0	0	0	3.97608	0	0	0	0.312658	0	0	0	0.681953	0	0	0
Calyptranthes cf. lanceolata O. Berg	1	0	0	0	0.3367	0	0	0	0.00334423	0	0	0	0.0523768	0	0	0	1	0	0		0.657895	0	0	0	1.04697	0	0	0	3.40885	0	0	0	0.268054	0	0	0	0.608098	0	0	0
Campsiandra cf. steyermarkiana Stergios	0	0	1	0	0	0	2.04082	0	0	0	0.0121037	0	0	0	0.48661	0	0	0	1		0	0	2.85714	0	0	0	5.38457	0	0	0	1.96895	0	0	0	0.45256	0	0	0	2.50548	0
Casearia javitensis Kunth	2	0	0	0	0.673401	0	0	0	0.0242074	0	0	0	0.379132	0	0	0	1	0	0		0.657895	0	0	0	1.71043	0	0	0	17.0442	0	0	0	1.34027	0	0	0	2.03788	0	0	0
Casearia cf. arborea (Rich.) Urb.	3	0	0	0	1.0101	0	0	0	0.0195063	0	0	0	0.305506	0	0	0	2	0	0		1.31579	0	0	0	2.6314	0	0	0	12.2282	0	0	0	0.961562	0	0	0	1.99117	0	0	0
Cassia sp. 1	2	0	1	0	0.673401	0	2.04082	0	0.0159552	0	0.462192	0	0.249888	0	18.5817	0	1	0	1		0.657895	0	2.85714	0	1.58118	0	23.4797	0	4.21061	0	38.8519	0	0.3311	0	8.93006	0	1.02046	0	11.4331	0
Cecropia ficifolia Warb. ex Snethl.	13	0	0	0	4.3771	0	0	0	0.22211	0	0	0	3.47865	0	0	0	5	0	0		3.28947	0	0	0	11.1452	0	0	0	47.2602	0	0	0	3.71629	0	0	0	8.31551	0	0	0
Cecropia latiloba Miq.	1	2	2	0	0.3367	1.48148	4.08163	0	0.0187185	0.0261092	0.00452794	0	0.293167	0.537133	0.182039	0	1	2	1		0.657895	2.35294	2.85714	0	1.28776	4.37156	7.12081	0	3.97608	4.53786	4.75602	0	0.312658	0.589597	1.09317	0	0.668077	2.09719	5.17933	0
Cecropia peltata L.	1	1	1	0	0.3367	0.740741	2.04082	0	0.0208607	0.00203717	0.00385153	0	0.326717	0.0419098	0.154845	0	1	1	1		0.657895	1.17647	2.85714	0	1.32131	1.95912	5.0528	0	6.68134	1.57625	1.76715	0	0.525385	0.2048	0.406176	0	0.882946	0.947578	2.45084	0
Cecropia sciadophylla Mart.	19	0	0	0	6.39731	0	0	0	0.134869	0	0	0	2.1123	0	0	0	3	0	0		1.97368	0	0	0	10.4833	0	0	0	68.4778	0	0	0	5.38473	0	0	0	11.9169	0	0	0
Ceiba cf. samauma (Mart.) K. Schum.	2	2	0	0	0.673401	1.48148	0	0	0.0415357	0.0266504	0	0	0.650527	0.548266	0	0	2	2	0		1.31579	2.35294	0	0	2.63972	4.38269	0	0	5.37234	5.20326	0	0	0.422452	0.676052	0	0	1.13739	2.18418	0	0
Chimarrhis glabriflora Ducke	1	0	0	0	0.3367	0	0	0	0.00537941	0	0	0	0.0842516	0	0	0	1	0	0		0.657895	0	0	0	1.07885	0	0	0	7.8758	0	0	0	0.619311	0	0	0	0.961391	0	0	0
Chrysophyllum sp. 1	0	1	0	0	0	0.740741	0	0	0	0.020698	0	0	0	0.42581	0	0	0	1	0		0	1.17647	0	0	0	2.34302	0	0	0	4.27606	0	0	0	0.555582	0	0	0	1.31702	0	0
Citrus limon (L.) Osbeck	1	3	0	0	0.3367	2.22222	0	0	0.00623884	0.0235548	0	0	0.0977119	0.484582	0	0	1	3	0		0.657895	3.52941	0	0	1.09231	6.23622	0	0	2.18166	7.54855	0	0	0.171554	0.980772	0	0	0.514493	3.22655	0	0
Citrus reticulata Blanco	3	1	0	0	1.0101	0.740741	0	0	0.0114989	0.0232047	0	0	0.180094	0.477379	0	0	2	1	0		1.31579	1.17647	0	0	2.50598	2.39459	0	0	6.40318	3.40885	0	0	0.503512	0.442906	0	0	1.52511	1.20685	0	0
Citrus sinensis (L.) Osbeck	0	1	0	0	0	0.740741	0	0	0	0.00318308	0	0	0	0.0654841	0	0	0	1	0		0	1.17647	0	0	0	1.9827	0	0	0	0.0490874	0	0	0	0.00637785	0	0	0	0.750302	0	0
Citrus Limetta Risso	1	0	0	0	0.3367	0	0	0	0.028362	0	0	0	0.444202	0	0	0	1	0	0		0.657895	0	0	0	1.4388	0	0	0	3.40885	0	0	0	0.268054	0	0	0	0.633116	0	0	0
Citrus nobilis Lour	0	1	0	0	0	0.740741	0	0	0	0.0418277	0	0	0	0.860502	0	0	0	1	0		0	1.17647	0	0	0	2.77771	0	0	0	4.90874	0	0	0	0.637785	0	0	0	1.42035	0	0
Clitoria cf. javitensis (Kunth) Benth.	1	0	0	0	0.3367	0	0	0	0.00114591	0	0	0	0.0179471	0	0	0	1	0	0		0.657895	0	0	0	1.01254	0	0	0	0.659953	0	0	0	0.0518952	0	0	0	0.389741	0	0	0
Coccoloba ascendens Duss ex Lindau	1	0	0	0	0.3367	0	0	0	0.0103706	0	0	0	0.162422	0	0	0	1	0	0		0.657895	0	0	0	1.15702	0	0	0	2.18166	0	0	0	0.171554	0	0	0	0.518625	0	0	0
coccoloba sp. 1	1	0	0	0	0.3367	0	0	0	0.00580117	0	0	0	0.0908571	0	0	0	1	0	0		0.657895	0	0	0	1.08545	0	0	0	2.40528	0	0	0	0.189139	0	0	0	0.53164	0	0	0
Colubrina glandulosa Perkins	3	0	0	0	1.0101	0	0	0	0.0364104	0	0	0	0.570255	0	0	0	2	0	0		1.31579	0	0	0	2.89615	0	0	0	7.70672	0	0	0	0.606015	0	0	0	1.65253	0	0	0
Conceveiba sp. 1	1	0	0	0	0.3367	0	0	0	0.0389928	0	0	0	0.6107	0	0	0	1	0	0		0.657895	0	0	0	1.60529	0	0	0	6.305	0	0	0	0.495792	0	0	0	0.871485	0	0	0
Condaminea sp. 1	0	1	0	0	0	0.740741	0	0	0	0.000795771	0	0	0	0.016371	0	0	0	1	0		0	1.17647	0	0	0	1.93358	0	0	0	0.441786	0	0	0	0.0574007	0	0	0	0.798937	0	0
Cordia alliodora (Ruiz & Pav.) Oken	3	1	0	0	1.0101	0.740741	0	0	0.0137668	0.00814869	0	0	0.215614	0.167639	0	0	1	1	0		0.657895	1.17647	0	0	1.88361	2.08485	0	0	7.21039	4.27606	0	0	0.566987	0.555582	0	0	1.59085	1.30447	0	0
Couroupita guinanensis Aubl.	1	2	0	0	0.3367	1.48148	0	0	0.072121	0.0303371	0	0	1.12955	0.624111	0	0	1	2	0		0.657895	2.35294	0	0	2.12415	4.45853	0	0	6.305	6.02684	0	0	0.495792	0.783058	0	0	0.904613	2.29488	0	0
Crescentia cujete L.	0	1	0	0	0	0.740741	0	0	0	0.00439465	0	0	0	0.090409	0	0	0	1	0		0	1.17647	0	0	0	2.00762	0	0	0	7.06858	0	0	0	0.918411	0	0	0	1.66355	0	0
Croton matourensis Aubl.	2	0	0	0	0.673401	0	0	0	0.608765	0	0	0	9.53439	0	0	0	1	0	0		0.657895	0	0	0	10.8657	0	0	0	30.0688	0	0	0	2.36445	0	0	0	3.64661	0	0	0
Dialium guianense (Aubl.) Sandwith	0	0	1	0	0	0	2.04082	0	0	0	0.000962883	0	0	0	0.0387113	0	0	0	1		0	0	2.85714	0	0	0	4.93667	0	0	0	0.921752	0	0	0	0.211863	0	0	0	2.25364	0
Diplotropis martiusii Benth.	1	0	0	0	0.3367	0	0	0	0.0548207	0	0	0	0.858594	0	0	0	1	0	0		0.657895	0	0	0	1.85319	0	0	0	3.97608	0	0	0	0.312658	0	0	0	0.704179	0	0	0
Enterolobium schomburgkii (Benth.) Benth.	0	0	0	1	0	0	0	14.2857	0	0	0	0.0748741	0	0	0	7.83387	0	0	0	1	0	0	0	6.66667	0	0	0	28.7862	0	0	0	12.5664	0	0	0	3.72227	0	0	0	18.0829
Eschweilera coriacea (DC.) S.A. Mori	1	0	0	0	0.3367	0	0	0	0.00155971	0	0	0	0.024428	0	0	0	1	0	0		0.657895	0	0	0	1.01902	0	0	0	0.659953	0	0	0	0.0518952	0	0	0	0.390155	0	0	0
EUPHORBIACEAE sp.1	0	0	1	0	0	0	2.04082	0	0	0	0.201179	0	0	0	8.08809	0	0	0	1		0	0	2.85714	0	0	0	12.9861	0	0	0	7.46674	0	0	0	1.71622	0	0	0	3.95821	0
Fabaceae sp1	4	0	0	0	1.3468	0	0	0	0.0135003	0	0	0	0.211439	0	0	0	2	0	0		1.31579	0	0	0	2.87403	0	0	0	11.8216	0	0	0	0.929584	0	0	0	2.28989	0	0	0
Fabaceae sp2	0	1	0	0	0	0.740741	0	0	0	0.00947166	0	0	0	0.194856	0	0	0	1	0		0	1.17647	0	0	0	2.11207	0	0	0	2.88525	0	0	0	0.374876	0	0	0	1.12509	0	0
Ficus insipida Willd.	9	1	1	0	3.0303	0.740741	2.04082	0	0.361992	0.103418	0.00114591	0	5.66946	2.12758	0.0460696	0	7	1	1		4.60526	1.17647	2.85714	0	13.305	4.04479	4.94403	0	55.136	10.0847	1.76715	0	4.33561	1.31029	0.406176	0	7.7279	2.15445	2.44814	0
Ficus sp. 1	0	1	0	0	0	0.740741	0	0	0	0.716194	0	0	0	14.7339	0	0	0	1	0		0	1.17647	0	0	0	16.6511	0	0	0	21.6475	0	0	0	2.81263	0	0	0	4.26957	0	0
Gliricidia sepium (Jacq.) Kunth ex Walp.	1	1	0	0	0.3367	0.740741	0	0	0.00525599	0.00155971	0	0	0.0823186	0.0320872	0	0	1	1	0		0.657895	1.17647	0	0	1.07691	1.9493	0	0	1.96895	4.27606	0	0	0.154828	0.555582	0	0	0.496784	1.29788	0	0
Gloeospermum longifolium Hekking	2	0	0	0	0.673401	0	0	0	0.0450168	0	0	0	0.705046	0	0	0	1	0	0		0.657895	0	0	0	2.03634	0	0	0	5.29053	0	0	0	0.416019	0	0	0	1.13444	0	0	0
Grias neuberthii J.F. Macbr.	0	0	1	0	0	0	2.04082	0	0	0	0.0522105	0	0	0	2.09905	0	0	0	1		0	0	2.85714	0	0	0	6.997	0	0	0	3.14159	0	0	0	0.722091	0	0	0	2.81512	0
Grias cf. peruviana Miers	1	0	0	0	0.3367	0	0	0	0.00623884	0	0	0	0.0977119	0	0	0	1	0	0		0.657895	0	0	0	1.09231	0	0	0	1.39626	0	0	0	0.109795	0	0	0	0.452734	0	0	0
Guarea fissicalyx Harms	1	4	0	0	0.3367	2.96296	0	0	0.0103132	0.283088	0	0	0.161524	5.82383	0	0	1	3	0		0.657895	3.52941	0	0	1.15612	12.3162	0	0	5.93957	32.2777	0	0	0.467057	4.19379	0	0	0.81407	7.43984	0	0
Guarea guidonia (L.) Sleumer	1	0	1	0	0.3367	0	2.04082	0	0.00580117	0	0.122358	0	0.0908571	0	4.91921	0	1	0	1		0.657895	0	2.85714	0	1.08545	0	9.81717	0	2.40528	0	13.6354	0	0.189139	0	3.13407	0	0.53164	0	5.29725	0
Guatteria coeloneura Diels	2	0	0	0	0.673401	0	0	0	0.0123046	0	0	0	0.192713	0	0	0	1	0	0		0.657895	0	0	0	1.52401	0	0	0	3.75791	0	0	0	0.295502	0	0	0	0.981208	0	0	0
Guettarda sp. 1	1	1	0	0	0.3367	0.740741	0	0	0.012416	0.0289349	0	0	0.194458	0.595265	0	0	1	1	0		0.657895	1.17647	0	0	1.18905	2.51248	0	0	1.39626	4.58694	0	0	0.109795	0.595975	0	0	0.458911	1.36565	0	0
Gustavia augusta L.	1	1	0	0	0.3367	0.740741	0	0	0.0230331	0.00179048	0	0	0.360742	0.0368348	0	0	1	1	0		0.657895	1.17647	0	0	1.35534	1.95405	0	0	5.93957	1.06901	0	0	0.467057	0.138895	0	0	0.82679	0.881427	0	0
Hamelia patens Jacq.	1	0	0	0	0.3367	0	0	0	0.0114909	0	0	0	0.179969	0	0	0	1	0	0		0.657895	0	0	0	1.17456	0	0	0	1.39626	0	0	0	0.109795	0	0	0	0.457986	0	0	0
Heliocarpus americanus L.	1	2	0	0	0.3367	1.48148	0	0	0.0877338	0.115013	0	0	1.37407	2.3661	0	0	1	2	0		0.657895	2.35294	0	0	2.36867	6.20053	0	0	12.5664	12.31	0	0	0.988153	1.59942	0	0	1.41259	3.19592	0	0
Hieronyma alchorneoides Allemão	17	26	0	0	5.72391	19.2593	0	0	0.423163	0.459127	0	0	6.62752	9.44541	0	0	6	3	0		3.94737	3.52941	0	0	16.2988	32.2341	0	0	80.0015	78.2344	0	0	6.2909	10.1649	0	0	12.438	29.8833	0	0
Hieronyma oblonga (Tul.) Müll. Arg.	0	0	0	0	0	0	0	0	0	0	0	0	0	0	0	0	0	0	0		0	0	0	0	0	0	0	0	0	0	0	0	0	0	0	0	0	0	0	0
Inga cayennensis Sagot ex Benth.	0	3	1	0	0	2.22222	2.04082	0	0	0.0135336	0.0305894	0	0	0.27842	1.2298	0	0	1	1		0	1.17647	2.85714	0	0	3.67711	6.12776	0	0	13.7281	10.0847	0	0	1.78367	2.31796	0	0	4.01943	4.38937	0
Inga laurina (Sw.) Willd.	1	1	0	0	0.3367	0.740741	0	0	0.0460848	0.145029	0	0	0.721773	2.98362	0	0	1	1	0		0.657895	1.17647	0	0	1.71637	4.90083	0	0	1.96895	17.7205	0	0	0.154828	2.3024	0	0	0.537613	3.18817	0	0
Inga minutula (Schery) T.S. Elias	22	9	10	2	7.40741	6.66667	20.4082	28.5714	0.613241	0.616229	0.647872	0.614969	9.6045	12.6774	26.0467	64.3425	7	5	6	9	4.60526	5.88235	17.1429	60	21.6172	25.2264	63.5977	152.914	175.335	104.649	194.092	289.505	13.7874	13.5969	44.6117	85.7539	21.808	20.8798	65.6677	114.94
Inga sp. 1	1	0	0	0	0.3367	0	0	0	0.0103132	0	0	0	0.161524	0	0	0	1	0	0		0.657895	0	0	0	1.15612	0	0	0	5.58505	0	0	0	0.439179	0	0	0	0.786192	0	0	0
Inga sp. 2	2	0	0	0	0.673401	0	0	0	0.0177059	0	0	0	0.277307	0	0	0	1	0	0		0.657895	0	0	0	1.6086	0	0	0	8.56302	0	0	0	0.673351	0	0	0	1.36446	0	0	0
Inga sp. 3	0	1	0	0	0	0.740741	0	0	0	0.0147138	0	0	0	0.3027	0	0	0	1	0		0	1.17647	0	0	0	2.21991	0	0	0	3.14159	0	0	0	0.408182	0	0	0	1.16364	0	0
Inga sp. 6	0	0	1	0	0	0	2.04082	0	0	0	0.0103132	0	0	0	0.414626	0	0	0	1		0	0	2.85714	0	0	0	5.31259	0	0	0	2.40528	0	0	0	0.552851	0	0	0	2.60398	0
Isertia hypoleuca Benth.	1	0	0	0	0.3367	0	0	0	0.00243705	0	0	0	0.0381687	0	0	0	1	0	0		0.657895	0	0	0	1.03276	0	0	0	1.96895	0	0	0	0.154828	0	0	0	0.493965	0	0	0
Jacaranda copaia (Bertol.) A. DC	0	2	1	0	0	1.48148	2.04082	0	0	0.0534075	0.203717	0	0	1.09873	8.19015	0	0	1	1		0	1.17647	2.85714	0	0	3.75668	13.0881	0	0	14.5353	14.1863	0	0	1.88855	3.26069	0	0	3.42344	5.50523	0
Jacaratia digitata (Poepp. & Endl.) Solms	1	0	0	0	0.3367	0	0	0	0.0322899	0	0	0	0.50572	0	0	0	1	0	0		0.657895	0	0	0	1.50032	0	0	0	4.27606	0	0	0	0.336246	0	0	0	0.705237	0	0	0
Leonia crassa L.B. Sm. & A Fernandez	1	3	0	0	0.3367	2.22222	0	0	0.0463273	0.225289	0	0	0.725572	4.63476	0	0	1	2	0		0.657895	2.35294	0	0	1.72017	9.20993	0	0	5.24144	9.0648	0	0	0.412159	1.17778	0	0	0.795187	3.62529	0	0
Macrolobium colombianum (Britton & Killip) Killip ex L. Uribe	2	0	0	0	0.673401	0	0	0	0.0182697	0	0	0	0.286138	0	0	0	1	0	0		0.657895	0	0	0	1.61743	0	0	0	2.64526	0	0	0	0.20801	0	0	0	0.89968	0	0	0
Miconia trinervia (Sw.) D. Don ex Loudon	1	0	0	0	0.3367	0	0	0	0.00764736	0	0	0	0.119772	0	0	0	1	0	0		0.657895	0	0	0	1.11437	0	0	0	2.18166	0	0	0	0.171554	0	0	0	0.515902	0	0	0
Miconia cf. floribunda (Bonpl.) DC.	1	0	0	0	0.3367	0	0	0	0.0198943	0	0	0	0.311581	0	0	0	1	0	0		0.657895	0	0	0	1.30618	0	0	0	5.93957	0	0	0	0.467057	0	0	0	0.823651	0	0	0
Micropholis guyanensis (A.DC.) Pierre	0	0	1	0	0	0	2.04082	0	0	0	0.0561496	0	0	0	2.25741	0	0	0	1		0	0	2.85714	0	0	0	7.15537	0	0	0	7.06858	0	0	0	1.6247	0	0	0	3.72167	0
Moraceae sp2	1	0	0	0	0.3367	0	0	0	0.0315842	0	0	0	0.494667	0	0	0	1	0	0		0.657895	0	0	0	1.48926	0	0	0	3.68701	0	0	0	0.289927	0	0	0	0.658211	0	0	0
Morinda citrifolia L.	0	1	0	0	0	0.740741	0	0	0	0.0154061	0	0	0	0.316943	0	0	0	1	0		0	1.17647	0	0	0	2.23415	0	0	0	2.18166	0	0	0	0.28346	0	0	0	1.03961	0	0
Ocotea cernua (Nees) Mez	0	0	0	0	0	0	0	0	0	0	0	0	0	0	0	0	0	0	0		0	0	0	0	0	0	0	0	0	0	0	0	0	0	0	0	0	0	0	0
Palicourea lasiantha K. Krause	1	0	0	0	0.3367	0	0	0	0.0121037	0	0	0	0.189566	0	0	0	1	0	0		0.657895	0	0	0	1.18416	0	0	0	0.785398	0	0	0	0.0617595	0	0	0	0.410564	0	0	0
palicourea sp.1	1	0	0	0	0.3367	0	0	0	0.0100287	0	0	0	0.157068	0	0	0	1	0	0		0.657895	0	0	0	1.15166	0	0	0	6.305	0	0	0	0.495792	0	0	0	0.842521	0	0	0
Parkia cf. velutina Benoist	0	1	0	0	0	0.740741	0	0	0	0.0249554	0	0	0	0.513396	0	0	0	1	0		0	1.17647	0	0	0	2.43061	0	0	0	4.27606	0	0	0	0.555582	0	0	0	1.32128	0	0
Pausandra trianae (Müll. Arg.) Baill.	3	0	0	0	1.0101	0	0	0	0.0323654	0	0	0	0.506902	0	0	0	1	0	0		0.657895	0	0	0	2.1749	0	0	0	6.88314	0	0	0	0.541254	0	0	0	1.58372	0	0	0
Pentagonia macrophylla Benth.	5	0	0	0	1.6835	0	0	0	0.0308262	0	0	0	0.482795	0	0	0	1	0	0		0.657895	0	0	0	2.82419	0	0	0	15.4462	0	0	0	1.2146	0	0	0	2.92893	0	0	0
pentagonia sp. 1	1	0	0	0	0.3367	0	0	0	0.0168385	0	0	0	0.263723	0	0	0	1	0	0		0.657895	0	0	0	1.25832	0	0	0	7.8758	0	0	0	0.619311	0	0	0	0.97285	0	0	0
Picramnia sp.	1	0	0	0	0.3367	0	0	0	0.00385153	0	0	0	0.0603222	0	0	0	1	0	0		0.657895	0	0	0	1.05492	0	0	0	0.545415	0	0	0	0.0428886	0	0	0	0.38344	0	0	0
Piper aduncum L.	1	0	0	0	0.3367	0	0	0	0.00179048	0	0	0	0.0280423	0	0	0	1	0	0		0.657895	0	0	0	1.02264	0	0	0	1.22718	0	0	0	0.0964993	0	0	0	0.43499	0	0	0
Piptocoma discolor (Kunth) Pruski	1	0	0	0	0.3367	0	0	0	0.00893054	0	0	0	0.139869	0	0	0	1	0	0		0.657895	0	0	0	1.13446	0	0	0	1.96895	0	0	0	0.154828	0	0	0	0.500459	0	0	0
Platymiscium stipulare Benth.	3	0	0	0	1.0101	0	0	0	0.0161144	0	0	0	0.252381	0	0	0	1	0	0		0.657895	0	0	0	1.92038	0	0	0	8.01761	0	0	0	0.630462	0	0	0	1.65668	0	0	0
Pouteria cf. caimito (Ruiz & pav.) Randlk	1	0	0	0	0.3367	0	0	0	0.000389928	0	0	0	0.006107	0	0	0	1	0	0		0.657895	0	0	0	1.0007	0	0	0	0.267254	0	0	0	0.0210154	0	0	0	0.358106	0	0	0
Protium cf. glaberscens Swart	1	0	0	0	0.3367	0	0	0	0.0164744	0	0	0	0.258021	0	0	0	1	0	0		0.657895	0	0	0	1.25262	0	0	0	5.24144	0	0	0	0.412159	0	0	0	0.765334	0	0	0
Prunus accumulans (Koehne) C.L. Li & Aymard	0	1	0	0	0	0.740741	0	0	0	0.0121037	0	0	0	0.249003	0	0	0	1	0		0	1.17647	0	0	0	2.16621	0	0	0	9.16843	0	0	0	1.19124	0	0	0	1.94409	0	0
Psidium guajava L.	7	7	0	0	2.3569	5.18519	0	0	0.0712863	0.250299	0	0	1.11648	5.14928	0	0	5	5	0		3.28947	5.88235	0	0	6.76285	16.2168	0	0	15.2171	79.1725	0	0	1.19659	10.2868	0	0	3.62478	15.7222	0	0
Rinorea sp. 1	1	0	0	0	0.3367	0	0	0	0.0140374	0	0	0	0.219852	0	0	0	1	0	0		0.657895	0	0	0	1.21445	0	0	0	4.58694	0	0	0	0.360693	0	0	0	0.711431	0	0	0
Rollinia edulis Triana & Planch.	1	0	0	0	0.3367	0	0	0	0.00814869	0	0	0	0.127624	0	0	0	1	0	0		0.657895	0	0	0	1.12222	0	0	0	6.23104	0	0	0	0.489976	0	0	0	0.834825	0	0	0
Rollinia cf. cuspidata Mart.	0	1	0	0	0	0.740741	0	0	0	0.000962883	0	0	0	0.0198089	0	0	0	1	0		0	1.17647	0	0	0	1.93702	0	0	0	0.19635	0	0	0	0.0255114	0	0	0	0.767215	0	0
Rollinia edulis Triana & Planch	1	0	0	0	0.3367	0	0	0	0.0103132	0	0	0	0.161524	0	0	0	1	0	0		0.657895	0	0	0	1.15612	0	0	0	2.88525	0	0	0	0.226881	0	0	0	0.573894	0	0	0
Sapium eglandulosum Ule	1	0	0	0	0.3367	0	0	0	0.00350935	0	0	0	0.054963	0	0	0	1	0	0		0.657895	0	0	0	1.04956	0	0	0	1.76715	0	0	0	0.138959	0	0	0	0.479169	0	0	0
Sapium glandulosum (L.) Morong	1	0	0	0	0.3367	0	0	0	0.0232047	0	0	0	0.363429	0	0	0	1	0	0		0.657895	0	0	0	1.35802	0	0	0	4.27606	0	0	0	0.336246	0	0	0	0.696151	0	0	0
Sapium marmieri Huber	24	5	4	0	8.08081	3.7037	8.16327	0	0.884952	0.382933	0.16628	0	13.86	7.8779	6.68505	0	8	4	2		5.26316	4.70588	5.71429	0	27.204	16.2875	20.5626	0	115.061	29.1579	15.1353	0	9.04777	3.78844	3.47882	0	18.0135	7.87508	11.8084	0
Sapium peruvianum Steud.	0	1	0	0	0	0.740741	0	0	0	0.00716194	0	0	0	0.147339	0	0	0	1	0		0	1.17647	0	0	0	2.06455	0	0	0	5.24144	0	0	0	0.681013	0	0	0	1.42892	0	0
Sapium eglandulosum Ule	12	0	0	0	4.0404	0	0	0	0.149147	0	0	0	2.33592	0	0	0	2	0	0		1.31579	0	0	0	7.69211	0	0	0	57.5967	0	0	0	4.5291	0	0	0	8.71865	0	0	0
Sapium sp. 1	1	0	0	0	0.3367	0	0	0	0.0176535	0	0	0	0.276486	0	0	0	1	0	0		0.657895	0	0	0	1.27108	0	0	0	2.88525	0	0	0	0.226881	0	0	0	0.581234	0	0	0
Schefflera morototoni (Aubl.) Maguire, Steyerm. & Frodin	0	1	0	0	0	0.740741	0	0	0	0.00385153	0	0	0	0.0792358	0	0	0	1	0		0	1.17647	0	0	0	1.99645	0	0	0	1.57625	0	0	0	0.2048	0	0	0	0.949392	0	0
Siparuna cristata (Poepp. & Endl.) A. DC.	3	0	1	0	1.0101	0	2.04082	0	0.0145944	0	0.0025783	0	0.228576	0	0.103657	0	1	0	1		0.657895	0	2.85714	0	1.89657	0	5.00162	0	4.37969	0	0.785398	0	0.344395	0	0.180523	0	1.36909	0	2.22392	0
Siparuna decipiens (Tul.) A. DC.	2	0	0	0	0.673401	0	0	0	0.032576	0	0	0	0.510201	0	0	0	2	0	0		1.31579	0	0	0	2.49939	0	0	0	3.80155	0	0	0	0.298933	0	0	0	1.00491	0	0	0
Siparuna guianensis Aubl.	2	0	0	0	0.673401	0	0	0	0.00703462	0	0	0	0.110175	0	0	0	2	0	0		1.31579	0	0	0	2.09937	0	0	0	9.64294	0	0	0	0.75827	0	0	0	1.43871	0	0	0
Solanum altissimum Benítez	2	0	0	0	0.673401	0	0	0	0.0495288	0	0	0	0.775713	0	0	0	2	0	0		1.31579	0	0	0	2.7649	0	0	0	29.3488	0	0	0	2.30783	0	0	0	3.03076	0	0	0
Sorocea cf. pubivena Hemsl.	2	0	0	0	0.673401	0	0	0	0.00305775	0	0	0	0.0478901	0	0	0	2	0	0		1.31579	0	0	0	2.03708	0	0	0	3.16341	0	0	0	0.248754	0	0	0	0.925212	0	0	0
Spondias	2	0	0	0	0.673401	0	0	0	0.0746115	0	0	0	1.16856	0	0	0	1	0	0		0.657895	0	0	0	2.49985	0	0	0	9.03753	0	0	0	0.710664	0	0	0	1.45868	0	0	0
Spondias mombim L.	27	6	3	2	9.09091	4.44444	6.12245	28.5714	0.51228	0.38396	0.21228	0.133196	8.02326	7.89902	8.53439	13.9359	4	4	2	3	2.63158	4.70588	5.71429	20	19.7458	17.0493	20.3711	62.5074	77.5581	45.3949	19.6622	23.1474	6.09875	5.89809	4.51934	6.85648	15.7019	10.7265	10.8541	35.5611
Stryphnodendron microstachyum Poepp.	3	0	0	0	1.0101	0	0	0	0.0260695	0	0	0	0.408296	0	0	0	1	0	0		0.657895	0	0	0	2.07629	0	0	0	14.579	0	0	0	1.14641	0	0	0	2.18258	0	0	0
Swietenia macrophylla King	4	11	5	0	1.3468	8.14815	10.2041	0	0.0849026	0.26507	0.0461945	0	1.32973	5.45317	1.85718	0	2	4	2		1.31579	4.70588	5.71429	0	3.99232	18.3072	17.7755	0	31.3668	118.339	10.2047	0	2.46652	15.3756	2.34554	0	3.89823	23.7888	12.5958	0
Tabebuia rosea (Bertol.) A. DC.	0	0	1	0	0	0	2.04082	0	0	0	0.0447621	0	0	0	1.79959	0	0	0	1		0	0	2.85714	0	0	0	6.69755	0	0	0	7.8758	0	0	0	1.81024	0	0	0	3.89582	0
Tabebuia sp. 1	1	0	0	0	0.3367	0	0	0	0.00623884	0	0	0	0.0977119	0	0	0	1	0	0		0.657895	0	0	0	1.09231	0	0	0	1.57625	0	0	0	0.123948	0	0	0	0.466887	0	0	0
Talisia cf. hemidasya Radlk.	1	0	0	0	0.3367	0	0	0	0.00588743	0	0	0	0.0922082	0	0	0	1	0	0		0.657895	0	0	0	1.0868	0	0	0	1.96895	0	0	0	0.154828	0	0	0	0.497416	0	0	0
Tetragastris panamensis (Engl.) Kuntze	0	2	0	0	0	1.48148	0	0	0	0.0115376	0	0	0	0.237357	0	0	0	2	0		0	2.35294	0	0	0	4.07178	0	0	0	6.55589	0	0	0	0.851797	0	0	0	2.34482	0	0
Tetrathylacium macrophyllum Poepp.	1	0	0	0	0.3367	0	0	0	0.0151968	0	0	0	0.23801	0	0	0	1	0	0		0.657895	0	0	0	1.2326	0	0	0	3.97608	0	0	0	0.312658	0	0	0	0.664555	0	0	0
Theobroma bicolor Bonpl.	2	0	0	0	0.673401	0	0	0	0.0106713	0	0	0	0.167132	0	0	0	2	0	0		1.31579	0	0	0	2.15632	0	0	0	5.67232	0	0	0	0.446041	0	0	0	1.13011	0	0	0
Theobroma glaucum H. Karst	1	0	0	0	0.3367	0	0	0	0.0424066	0	0	0	0.664167	0	0	0	1	0	0		0.657895	0	0	0	1.65876	0	0	0	4.58694	0	0	0	0.360693	0	0	0	0.7398	0	0	0
Thrichantea gigantea	0	1	2	0	0	0.740741	4.08163	0	0	0.0143736	0.0135798	0	0	0.295702	0.545957	0	0	1	1		0	1.17647	2.85714	0	0	2.21291	7.48473	0	0	6.305	31.9613	0	0	0.8192	7.34627	0	0	1.57431	11.4415	0
Trema micrantha (L.) Blume	5	1	0	0	1.6835	0.740741	0	0	0.0355192	0.00420963	0	0	0.556298	0.0866027	0	0	2	1	0		1.31579	1.17647	0	0	3.55559	2.00381	0	0	25.6736	2.88525	0	0	2.01883	0.374876	0	0	3.73785	1.11983	0	0
Urera caracasana (Jacq.) Gaudich. ex Griseb.	0	2	0	0	0	1.48148	0	0	0	0.01204	0	0	0	0.247694	0	0	0	1	0		0	1.17647	0	0	0	2.90565	0	0	0	5.29053	0	0	0	0.687391	0	0	0	2.18091	0	0
Vernonanthura patens (Kunth) H. Rob.	1	2	1	0	0.3367	1.48148	2.04082	0	0.00114591	0.00175865	0.00167311	0	0.0179471	0.03618	0.0672648	0	1	1	1		0.657895	1.17647	2.85714	0	1.01254	2.69413	4.96522	0	0.921752	2.96706	3.97608	0	0.0724817	0.385506	0.913896	0	0.410328	1.86875	2.95639	0
Virola duckei A.C. Sm.	1	0	0	0	0.3367	0	0	0	0.0398891	0	0	0	0.624738	0	0	0	1	0	0		0.657895	0	0	0	1.61933	0	0	0	3.68701	0	0	0	0.289927	0	0	0	0.666516	0	0	0
Vismia macrophylla Kunth	3	0	0	0	1.0101	0	0	0	0.0321909	0	0	0	0.50417	0	0	0	2	0	0		1.31579	0	0	0	2.83006	0	0	0	15.5825	0	0	0	1.22533	0	0	0	2.26762	0	0	0
Vitex orinocensis Kunth	2	1	1	0	0.673401	0.740741	2.04082	0	0.0513053	0.0110122	0.0496641	0	0.803537	0.226549	1.99667	0	1	1	1		0.657895	1.17647	2.85714	0	2.13483	2.14376	6.89463	0	8.31758	5.58505	11.0447	0	0.654051	0.725658	2.5386	0	1.37876	1.47741	4.62908	0
Wittmackanthus stanleyanus (R.H. Schomb.) Kuntze	1	1	0	0	0.3367	0.740741	0	0	0.0103132	0.00155971	0	0	0.161524	0.0320872	0	0	1	1	0		0.657895	1.17647	0	0	1.15612	1.9493	0	0	2.40528	3.40885	0	0	0.189139	0.442906	0	0	0.536152	1.18521	0	0
Xylopia ligustrifolia Humb. & Bonpl. ex Dunal	2	0	0	0	0.673401	0	0	0	0.241564	0	0	0	3.78335	0	0	0	1	0	0		0.657895	0	0	0	5.11464	0	0	0	30.1997	0	0	0	2.37474	0	0	0	3.2897	0	0	0
	297	135	49	7					6.38494	4.86085	2.48735	0.955774					152	85	35	15									1271.7	769.654	435.069	337.599
