# Supplementary material for: First typology of cacao (Theobroma cacao L.) systems in Colombian Amazonia, based on tree species richness, canopy structure and light availability
Source: PLoS One. 2018 Feb 5;13(2):e0191003. doi: 10.1371/journal.pone.0191003 (PMC5798779; doi:10.1371/journal.pone.0191003)
Supplement: S3 File — (XLSX) [file pone.0191003.s003.xlsx]

## Sheet: Hoja1
Plot number	Village	Latitude	Longitude
1	El Guamo	0.172417	-74.2958
2	El Guamo	0.167968	-74.3037
3	Sabaleta	0.356744	-74.115
4	Caño Santo Domingo	0.45054	-74.1678
5	Caño Negro	0.557217	-74.2829
6	Cuba	0.534975	-74.3191
7	Cuba	0.535079	-74.3197
8	Cuba	0.534882	-74.3189
9	Cuba	0.534623	-74.318
10	Cuba	0.534559	-74.3178
11	Cuba	0.520043	-74.3122
12	Cuba	0.52007	-74.3124
13	Cuba	0.520539	-74.3122
14	Cuba	0.519918	-74.3118
15	Cuba	0.525157	-74.3141
16	Cuba	0.525509	-74.3145
17	Cuba	0.526711	-74.3158
18	Cuba	0.526102	-74.3163
19	Cuba	0.508734	-74.3178
20	Cuba	0.508753	-74.318
21	Remolinos	0.607252	-74.3901
22	Las Claras	0.597999	-74.4589
23	Las Claras	0.598157	-74.4583
24	Las Claras	0.597693	-74.4581
25	Las Claras	0.597321	-74.4574
26	Las Claras	0.596698	-74.4575
27	Las Claras	0.595754	-74.4572
28	Café	0.674805	-74.5473
29	Café	0.675208	-74.5471
30	Café	0.674815	-74.5469
31	Cuba	0.540294	-74.3274
32	Cuba	0.539987	-74.3272
33	Cuba	0.540055	-74.3268
34	Remolinos	0.568111	-74.4067
35	Remolinos	0.567558	-74.4064
36	Remolinos	0.567488	-74.4064
37	Caño Negro	0.558009	-74.2828
38	Caño Negro	0.557618	-74.2823
39	Remolinos	0.587996	-74.4236
40	Remolinos	0.587857	-74.4243
41	Remolinos	0.587694	-74.4243
42	Remolinos	0.587906	-74.4241
43	Remolinos	0.588189	-74.4238
44	Remolinos	0.587427	-74.4236
45	Palmichales	0.659175	-74.5072
46	Palmichales	0.658985	-74.5068
47	Palmichales	0.659564	-74.5067
48	Cristales	0.910047	-74.7297
49	Cristales	0.909964	-74.7293
50	Cristales	0.909882	-74.7288
